# Supplementary material
Source: PubMed Central journal article supplement (PMC7860170)
Supplement: es0c06972_si_001.pdf [file es0c06972_si_001.pdf]

1 Supporting Information to:

2

3 **A quantitative microbial risk assessment of pediatric infections**  
4 **attributable to ingestion of fecally contaminated domestic soils in low-**  
5 **income urban Maputo, Mozambique**

6

7 **Authors:** Drew Capone<sup>1,2</sup>, Aaron Bivins<sup>3</sup>, Jackie Knee<sup>4</sup>, Oliver Cumming<sup>4</sup>, Rassul Nala<sup>5</sup>, Joe Brown<sup>1,2\*</sup>

8 1. Civil and Environmental Engineering, Georgia Institute of Technology, Atlanta, Georgia, United  
9 States of America

10 2. Department of Environmental Sciences and Engineering, Gillings School of Public Health,  
11 University of North Carolina at Chapel Hill, Chapel Hill, North Carolina, United States

12 3. Department of Civil and Environmental Engineering and Earth Sciences, University of Notre  
13 Dame, Notre Dame, Indiana, United States

14 4. Department of Disease Control, London School of Hygiene and Tropical Medicine, London,  
15 United Kingdom

16 5. Ministério da Saúde, Instituto Nacional de Saúde Maputo, Maputo, Mozambique

17 \*Corresponding author: Dr. Joe Brown

18 Phone: +1 919-360-8752

19 Email: [joebrown@unc.edu](mailto:joebrown@unc.edu)

20 Address: 135 Dauer Dr, Chapel Hill, NC 27599

21

22 Supporting Information: 8 figures, 9 tables, 3 texts

23

24

25 Text S1. Soil sampling location selection

26 In February 2018 we met with an adult from eight households enrolled in the MapSan trial to  
27 evaluate the feasibility of various sampling locations. We asked participants to identify an area  
28 where the household's children most frequently play in the compound (cluster of households  
29 sharing common living space and sanitation). None of the respondents were able to identify an  
30 area where the children most frequently play. Instead, responses indicated that children typically  
31 play all over the yard or with their friends in a neighboring compound. Due to the inability to  
32 systematically identify an area where children frequently play, we chose standardized locations  
33 that existed at each compound in the study. The standardized locations chose were likely to have  
34 relatively higher fecal contamination than other compound locations to represent an upper bound  
35 of infection risk.

36

37 Figure S1. Soil moisture content

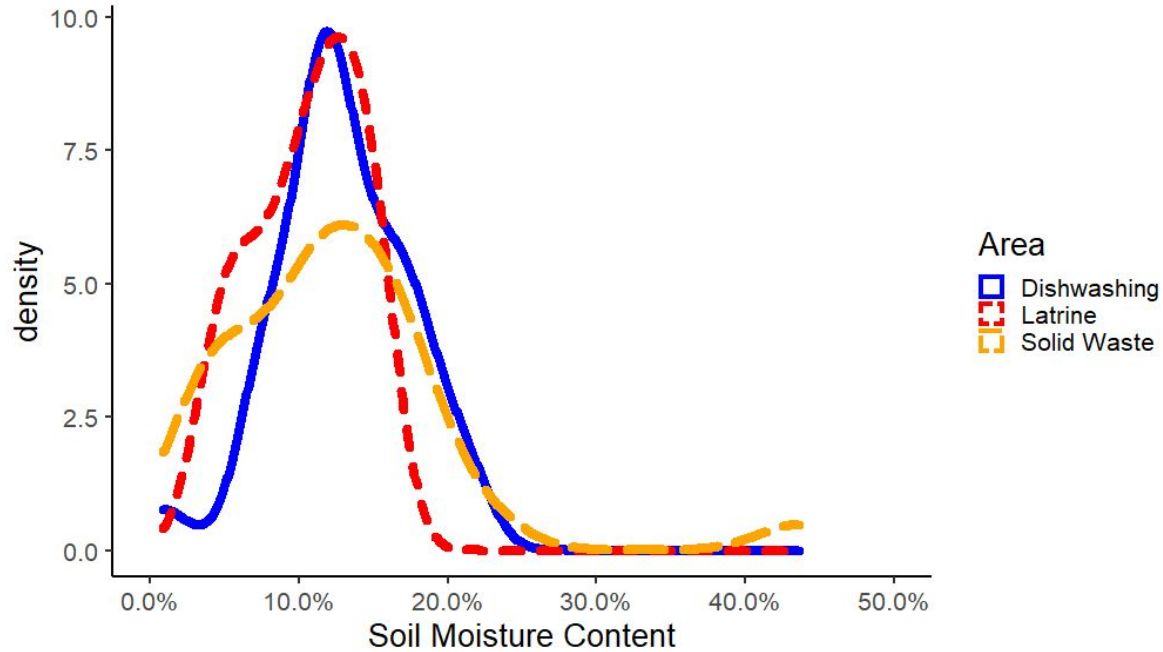

38

39 Kernel density plot of soil moisture content as a percent of overall mass by sampling location.

40 Table S1. Results from soil drying experiments

| Sample | Number | Moisture Content at 1 hour | Moisture Content at 2 hours |
|--------|--------|----------------------------|-----------------------------|
| A      | 1      | 0.28                       | 0.28                        |
| A      | 2      | 0.27                       | 0.27                        |
| A      | 3      | 0.26                       | 0.26                        |
| B      | 4      | 0.11                       | 0.11                        |
| B      | 5      | 0.13                       | 0.13                        |
| B      | 6      | 0.13                       | 0.13                        |
| C      | 7      | 0.33                       | 0.33                        |
| C      | 8      | 0.35                       | 0.35                        |
| C      | 9      | 0.34                       | 0.33                        |

41

42 We collected three soils in Atlanta using the methods described in this manuscript. One soil was  
 43 high in sand content, one was high in clay content, and the third was high in organic matter. We  
 44 dried each sample in triplicate for 1 hour, determined the moisture content, dried for an  
 45 additional hour, and then determined the moisture content again. The data shows that drying for  
 46 one hour vs. two hours made no substantial difference in the measured moisture content.

47 Text S2. Supplemental notes on ddPCR

#### 48 Adapting qPCR assays to ddPCR

49 Our methods to adapt qPCR assays to ddPCR have been extensively described in Bivins

50 *et al.* 2020.<sup>1</sup> Briefly, we first ran positive control materials (gBlock DNA) using a 10° Celsius

51 annealing temperature gradient. Then, we used the results to run a second 4° Celsius annealing

52 temperature gradient. From these results, we selected the annealing temperature that achieved the

53 greatest difference between the positive and negative droplet fluorescence amplitudes. The

54 thermocycling conditions used are listed in Table S1.

#### 55 ddPCR Reactions

56 We singleplexed all assays and used a final primer concentration of 900 nM and probe

57 concentration of 250 nM. Likewise, for the ybbW EvaGreen assay we used a primer

58 concentration 250nM. Table S1 lists the reagents used in our ddPCR reactions, which included

59 molecular-grade water, ddPCR Supermix for Probes or ddPCR EvaGreen Supermix (Bio-Rad,

60 Hercules, CA), primers, probe, and extract. On each ddPCR plate we included at least one no-

61 template control and at least one negative extraction control.

#### 62 ddPCR Analysis

63 To differentiate between positive and negative partitions we used conservative manual

64 thresholding (Figure S3). Due to the presence of 3 false positive partitions in our *beta-giardin*

65 controls (Table S2) and based on best practices from the literature<sup>2</sup>, we only called samples with

66 3 or more partitions above the manual threshold as positive for a gene target. In addition, we

67 successfully detected the MS2 process control in each sample.

68 Table S2. Descriptions of molecular assays

| Assay                                     | Probe concentration (nM) | Forward / reverse primer concentration (nm) | Template volume (dilution)          | Supermix or Mastermix (Volume)                                 | Reaction Volume | Cycling conditions                                                                                                                                                                                                                                                              |
|-------------------------------------------|--------------------------|---------------------------------------------|-------------------------------------|----------------------------------------------------------------|-----------------|---------------------------------------------------------------------------------------------------------------------------------------------------------------------------------------------------------------------------------------------------------------------------------|
| MS2 (reverse transcription PCR, ABI 7500) | 250                      | 900                                         | 1 $\mu$ L (none)                    | qScript™ XLT One-Step RT-qPCR ToughMix®, Low ROX™ (20 $\mu$ L) | 40 $\mu$ L      | <ol style="list-style-type: none"> <li>1. 45°C 10 minutes</li> <li>2. 94°C 10 minutes</li> <li>3. 40<math>\times</math> (94°C 0.5 minutes, 60°C 1 minute)</li> </ol> 2°C/s ramp rate; sample volume 40 $\mu$ L                                                                  |
| <i>ybbW</i> (ddPCR, QX 200)               | 250                      | 900                                         | 1 $\mu$ L, 2 $\mu$ L (none, 1:100)* | QX200™ ddPCR™ EvaGreen Supermix (10.5 $\mu$ L)                 | 21 $\mu$ L      | <ol style="list-style-type: none"> <li>1. 95°C 10 minutes</li> <li>2. 40<math>\times</math> (95°C 0.5 minutes, 59°C 2 minutes)</li> <li>3. 4°C 5 minutes</li> <li>4. 90°C 5 minutes</li> <li>5. 4°C hold</li> </ol> 1°C/s ramp rate, heated lid 105°C; sample volume 40 $\mu$ L |
| <i>ipaH</i> (ddPCR, QX 200)               | 250                      | 900                                         | 4 $\mu$ L (none)                    | ddPCR™ Supermix for Probes (10.5 $\mu$ L)                      | 21 $\mu$ L      | <ol style="list-style-type: none"> <li>1. 95°C 10 minutes</li> <li>2. 40<math>\times</math> (95°C 0.5 minutes, 58.7°C 1 minute)</li> <li>3. 98°C 10 minutes</li> <li>4. 4°C hold</li> </ol> 2°C/s ramp rate, heated lid 105°C; sample volume 40 $\mu$ L                         |
| <i>beta-giardin</i> (ddPCR, QX 200)       | 250                      | 900                                         | 4 $\mu$ L (none)                    | ddPCR™ Supermix for Probes                                     | 21 $\mu$ L      | <ol style="list-style-type: none"> <li>1. 95°C 10 minutes</li> <li>2. 40<math>\times</math> (95°C 0.5 minutes, 58.7°C 1 minute)</li> <li>3. 98°C 10 minutes</li> </ol>                                                                                                          |

|  |  |  |  |                |  |                                                                               |
|--|--|--|--|----------------|--|-------------------------------------------------------------------------------|
|  |  |  |  | (10.5 $\mu$ L) |  | 4. 4°C hold<br>2°C/s ramp rate, heated lid 105°C; sample<br>volume 40 $\mu$ L |
|--|--|--|--|----------------|--|-------------------------------------------------------------------------------|

69

70 \*Different volumes and dilutions were run for the *ybbW* assay to obtain results within the quantifiable range. See Table S5 for additional details.

71

72

73

74 Table S3. Summary of molecular and culture-based assays from combined trial arms.

75

| <b>Log<sub>10</sub> transformed density of <i>beta-giardin</i> gene copies per gram of dry soil</b> |              |            |        |           |
|-----------------------------------------------------------------------------------------------------|--------------|------------|--------|-----------|
| Location                                                                                            | Prevalence   | Mean (sd)  | Median | Range     |
| Latrine entrance                                                                                    | 47% (14/30)  | 2.0 (0.70) | 1.9    | 0.48, 3.3 |
| Solid waste                                                                                         | 30% (9/30)   | 1.8 (0.73) | 1.8    | 0, 3.4    |
| Dishwashing                                                                                         | 47% (14/30)  | 2.3 (0.81) | 2.0    | 0.85, 3.8 |
| Total                                                                                               | 41% (37/90)  | 2.0 (0.76) | 1.9    | 0, 3.8    |
| <b>Log<sub>10</sub> transformed density of <i>ipaH</i> gene copies per gram of dry soil</b>         |              |            |        |           |
| Location                                                                                            | Prevalence   | Mean (sd)  | Median | Range     |
| Latrine entrance                                                                                    | 57% (17/30)  | 2.6 (0.74) | 2.3    | 1.4, 4.9  |
| Solid waste                                                                                         | 30% (9/30)   | 2.3 (0.48) | 2.4    | 1.1, 3.4  |
| Dishwashing                                                                                         | 47% (14/30)  | 2.4 (0.62) | 2.3    | 1.3, 3.8  |
| Total                                                                                               | 44% (40/90)  | 2.4 (0.62) | 2.3    | 1.1, 4.9  |
| <b>Log<sub>10</sub> transformed density of <i>ybbW</i> gene copies per gram of dry soil</b>         |              |            |        |           |
| Location                                                                                            | Prevalence   | Mean (sd)  | Median | Range     |
| Latrine entrance                                                                                    | 100% (30/30) | 5.8 (0.33) | 5.8    | 5.4, 6.8  |
| Solid waste                                                                                         | 100% (30/30) | 5.7 (0.35) | 5.7    | 4.9, 6.3  |
| Dishwashing                                                                                         | 100% (30/30) | 6.1 (0.27) | 6.1    | 5.5, 6.8  |
| Total                                                                                               | 100% (90/90) | 5.9 (0.37) | 5.9    | 4.9, 6.8  |
| <b>Log<sub>10</sub> transformed count of CFU <i>E. coli</i> per gram of dry soil</b>                |              |            |        |           |
| Location                                                                                            | Prevalence   | Mean (sd)  | Median | Range     |
| Latrine entrance                                                                                    | 87% (26/30)  | 3.0 (1.1)  | 3.2    | 0.90, 5.3 |
| Solid waste                                                                                         | 87% (26/30)  | 3.2 (1.1)  | 3.1    | 1.1, 5.2  |
| Dishwashing                                                                                         | 90% (27/30)  | 3.3 (1.2)  | 3.3    | 0, 5.3    |
| Total                                                                                               | 88% (79/90)  | 3.2 (1.1)  | 3.2    | 0, 5.3    |

76 Note: For reporting purposes all non-detects (ND) were imputed to random value from zero to the 95% LOD for molecular assays and  
 77 from zero to the LOD for the culture-based assay. Data in this table is combined from both trial arms.

78

79 Table S4. Summary of molecular and culture-based assay from 15 MapSan intervention compounds

| <b>Log<sub>10</sub> transformed density of <i>beta-giardin</i> gene copies per gram of dry soil</b> |              |            |        |           |
|-----------------------------------------------------------------------------------------------------|--------------|------------|--------|-----------|
| Location                                                                                            | Prevalence   | Mean (sd)  | Median | Range     |
| Latrine entrance                                                                                    | 53% (8/15)   | 2.0 (0.79) | 2.1    | 0.48, 3.2 |
| Solid waste                                                                                         | 60% (9/15)   | 1.9 (0.61) | 1.9    | 0.90, 2.7 |
| Dishwashing                                                                                         | 47% (7/15)   | 2.5 (0.79) | 2.5    | 0.85, 3.8 |
| Total                                                                                               | 53% (24/45)  | 2.2 (0.75) | 2.2    | 0.48, 3.8 |
| <b>Log<sub>10</sub> transformed density of <i>ipaH</i> gene copies per gram of dry soil</b>         |              |            |        |           |
| Location                                                                                            | Prevalence   | Mean (sd)  | Median | Range     |
| Latrine entrance                                                                                    | 47% (7/15)   | 2.4 (0.35) | 2.3    | 2.0, 3.1  |
| Solid waste                                                                                         | 60% (9/15)   | 2.3 (0.49) | 2.4    | 1.1, 3.1  |
| Dishwashing                                                                                         | 33% (5/15)   | 2.5 (0.59) | 2.4    | 1.5, 3.8  |
| Total                                                                                               | 47% (21/45)  | 2.4 (0.48) | 2.3    | 1.1, 3.8  |
| <b>Log<sub>10</sub> transformed density of <i>ybbW</i> gene copies per gram of dry soil</b>         |              |            |        |           |
| Location                                                                                            | Prevalence   | Mean (sd)  | Median | Range     |
| Latrine entrance                                                                                    | 100% (15/15) | 5.8 (0.37) | 5.8    | 5.4, 6.8  |
| Solid waste                                                                                         | 100% (15/15) | 5.6 (0.31) | 5.6    | 4.9, 6.1  |
| Dishwashing                                                                                         | 100% (15/15) | 6.2 (0.23) | 6.2    | 5.9, 6.8  |
| Total                                                                                               | 100% (15/15) | 5.9 (0.39) | 5.9    | 4.9, 6.8  |
| <b>Log<sub>10</sub> transformed count of CFU <i>E. coli</i> per gram of dry soil</b>                |              |            |        |           |
| Location                                                                                            | Prevalence   | Mean (sd)  | Median | Range     |
| Latrine entrance                                                                                    | 80% (12/15)  | 3.4 (1.1)  | 3.4    | 1.4, 5.3  |
| Solid waste                                                                                         | 13% (2/15)   | 3.0 (1.2)  | 2.9    | 1.0, 5.2  |
| Dishwashing                                                                                         | 93% (14/15)  | 3.3 (0.99) | 3.2    | 1.7, 5.3  |
| Total                                                                                               | 84% (38/45)  | 3.2 (1.1)  | 3.2    | 1.0, 5.3  |

80 Note: For reporting purposes all non-detects (ND) were imputed to random value from zero to the 95% LOD for molecular assays and  
81 from zero to the LOD for the culture-based assay

82

83



84 Table S5. Summary of molecular and culture-based assay from 15 MapSan control compounds

| <b>Log<sub>10</sub> transformed density of <i>beta-giardin</i> gene copies per gram of dry soil</b> |              |            |        |           |
|-----------------------------------------------------------------------------------------------------|--------------|------------|--------|-----------|
| Location                                                                                            | Prevalence   | Mean (sd)  | Median | Range     |
| Latrine entrance                                                                                    | 40% (6/15)   | 2.0 (0.62) | 1.9    | 1.3, 3.3  |
| Solid waste                                                                                         | 13% (2/15)   | 1.6 (0.80) | 1.5    | 0, 3.4    |
| Dishwashing                                                                                         | 33% (5/15)   | 2.0 (0.79) | 1.7    | 1.1, 3.5  |
| Total                                                                                               | 29% (13/45)  | 1.9 (0.75) | 1.7    | 0, 3.5    |
| <b>Log<sub>10</sub> transformed density of <i>ipaH</i> gene copies per gram of dry soil</b>         |              |            |        |           |
| Location                                                                                            | Prevalence   | Mean (sd)  | Median | Range     |
| Latrine entrance                                                                                    | 67% (10/15)  | 2.7 (0.96) | 2.3    | 1.4, 4.9  |
| Solid waste                                                                                         | 27% (4/15)   | 2.3 (0.50) | 2.3    | 1.5, 3.4  |
| Dishwashing                                                                                         | 33% (5/15)   | 2.2 (0.62) | 2.3    | 1.3, 3.5  |
| Total                                                                                               | 42% (19/45)  | 2.4 (0.74) | 2.3    | 1.3, 4.9  |
| <b>Log<sub>10</sub> transformed density of <i>ybbW</i> gene copies per gram of dry soil</b>         |              |            |        |           |
| Location                                                                                            | Prevalence   | Mean (sd)  | Median | Range     |
| Latrine entrance                                                                                    | 100% (15/15) | 5.9 (0.30) | 5.9    | 5.4, 6.4  |
| Solid waste                                                                                         | 100% (15/15) | 5.8 (0.38) | 5.9    | 5.0, 6.3  |
| Dishwashing                                                                                         | 100% (15/15) | 6.1 (0.31) | 6.1    | 5.5, 6.5  |
| Total                                                                                               | 100% (15/15) | 5.9 (0.35) | 5.9    | 5.0, 6.5  |
| <b>Log<sub>10</sub> transformed count of CFU <i>E. coli</i> per gram of dry soil</b>                |              |            |        |           |
| Location                                                                                            | Prevalence   | Mean (sd)  | Median | Range     |
| Latrine entrance                                                                                    | 67% (10/15)  | 2.7 (1.0)  | 2.9    | 0.90, 4.6 |
| Solid waste                                                                                         | 87% (13/15)  | 3.3 (1.0)  | 3.5    | 1.6, 5.2  |
| Dishwashing                                                                                         | 73% (11/15)  | 3.2 (1.5)  | 3.6    | 0, 5.1    |
| Total                                                                                               | 76% (34/45)  | 3.1 (1.2)  | 3.2    | 0, 5.2    |

85 Note: For reporting purposes all non-detects (ND) were imputed to random value from zero to the 95% LOD for molecular assays and  
86 from zero to the LOD for the culture-based assay

87

88

89 Table S6. Control experiment results

| Molecular Assay      |                     |                     |
|----------------------|---------------------|---------------------|
|                      | <i>beta-giardin</i> |                     |
|                      | Positive partitions | Negative partitions |
| Extraction controls  | 3                   | 86243               |
| No template controls | 0                   | 49747               |
|                      | <i>ipaH</i>         |                     |
|                      | Positive partitions | Negative partitions |
| Extraction controls  | 0                   | 87230               |
| No template controls | 0                   | 67520               |
|                      | <i>ybbW</i>         |                     |
|                      | Positive partitions | Negative partitions |
| Extraction controls  | 0                   | 97015               |
| No template controls | 0                   | 38749               |

91 Table S7. Droplet data

| Compound | Area        | Target              | Dilution | Template Volume ( $\mu\text{L}$ ) | Accepted Droplets | Positives | Negatives | Lambda*  |
|----------|-------------|---------------------|----------|-----------------------------------|-------------------|-----------|-----------|----------|
| 1        | Dishwashing | <i>beta-giardin</i> | none     | 4                                 | 17416             | 9         | 17407     | 5.17E-04 |
| 2        | Dishwashing | <i>beta-giardin</i> | none     | 4                                 | 14919             | 0         | 14919     | 0.00E+00 |
| 3        | Dishwashing | <i>beta-giardin</i> | none     | 4                                 | 16167             | 30        | 16137     | 1.86E-03 |
| 4        | Dishwashing | <i>beta-giardin</i> | none     | 4                                 | 12411             | 3         | 12408     | 2.42E-04 |
| 5        | Dishwashing | <i>beta-giardin</i> | none     | 4                                 | 12733             | 49        | 12684     | 3.86E-03 |
| 6        | Dishwashing | <i>beta-giardin</i> | none     | 4                                 | 11080             | 52        | 11028     | 4.70E-03 |
| 7        | Dishwashing | <i>beta-giardin</i> | none     | 4                                 | 14094             | 28        | 14066     | 1.99E-03 |
| 8        | Dishwashing | <i>beta-giardin</i> | none     | 4                                 | 13337             | 0         | 13337     | 0.00E+00 |
| 9        | Dishwashing | <i>beta-giardin</i> | none     | 4                                 | 11607             | 2         | 11605     | 1.72E-04 |
| 10       | Dishwashing | <i>beta-giardin</i> | none     | 4                                 | 11875             | 13        | 11862     | 1.10E-03 |
| 11       | Dishwashing | <i>beta-giardin</i> | none     | 4                                 | 10176             | 25        | 10151     | 2.46E-03 |
| 12       | Dishwashing | <i>beta-giardin</i> | none     | 4                                 | 12971             | 0         | 12971     | 0.00E+00 |
| 13       | Dishwashing | <i>beta-giardin</i> | none     | 4                                 | 17337             | 27        | 17310     | 1.56E-03 |
| 14       | Dishwashing | <i>beta-giardin</i> | none     | 4                                 | 17428             | 0         | 17428     | 0.00E+00 |
| 15       | Dishwashing | <i>beta-giardin</i> | none     | 4                                 | 12292             | 0         | 12292     | 0.00E+00 |
| 16       | Dishwashing | <i>beta-giardin</i> | none     | 4                                 | 13922             | 0         | 13922     | 0.00E+00 |
| 17       | Dishwashing | <i>beta-giardin</i> | none     | 4                                 | 10605             | 29        | 10576     | 2.74E-03 |
| 18       | Dishwashing | <i>beta-giardin</i> | none     | 4                                 | 13288             | 0         | 13288     | 0.00E+00 |

|    |             |                     |      |   |       |    |       |          |
|----|-------------|---------------------|------|---|-------|----|-------|----------|
| 19 | Dishwashing | <i>beta-giardin</i> | none | 4 | 13512 | 0  | 13512 | 0.00E+00 |
| 20 | Dishwashing | <i>beta-giardin</i> | none | 4 | 11655 | 0  | 11655 | 0.00E+00 |
| 21 | Dishwashing | <i>beta-giardin</i> | none | 4 | 16205 | 38 | 16167 | 2.35E-03 |
| 22 | Dishwashing | <i>beta-giardin</i> | none | 4 | 12861 | 0  | 12861 | 0.00E+00 |
| 23 | Dishwashing | <i>beta-giardin</i> | none | 4 | 12143 | 28 | 12115 | 2.31E-03 |
| 24 | Dishwashing | <i>beta-giardin</i> | none | 4 | 13072 | 5  | 13067 | 3.83E-04 |
| 25 | Dishwashing | <i>beta-giardin</i> | none | 4 | 10141 | 0  | 10141 | 0.00E+00 |
| 26 | Dishwashing | <i>beta-giardin</i> | none | 4 | 12350 | 18 | 12332 | 1.46E-03 |
| 27 | Dishwashing | <i>beta-giardin</i> | none | 4 | 14429 | 2  | 14427 | 1.39E-04 |
| 28 | Dishwashing | <i>beta-giardin</i> | none | 4 | 11882 | 0  | 11882 | 0.00E+00 |
| 29 | Dishwashing | <i>beta-giardin</i> | none | 4 | 13086 | 0  | 13086 | 0.00E+00 |
| 30 | Dishwashing | <i>beta-giardin</i> | none | 4 | 12163 | 0  | 12163 | 0.00E+00 |
| 1  | Latrine     | <i>beta-giardin</i> | none | 4 | 12305 | 0  | 12305 | 0.00E+00 |
| 2  | Latrine     | <i>beta-giardin</i> | none | 4 | 14131 | 19 | 14112 | 1.35E-03 |
| 3  | Latrine     | <i>beta-giardin</i> | none | 4 | 12724 | 3  | 12721 | 2.36E-04 |
| 4  | Latrine     | <i>beta-giardin</i> | none | 4 | 11267 | 0  | 11267 | 0.00E+00 |
| 5  | Latrine     | <i>beta-giardin</i> | none | 4 | 11204 | 15 | 11189 | 1.34E-03 |
| 6  | Latrine     | <i>beta-giardin</i> | none | 4 | 11593 | 8  | 11585 | 6.90E-04 |
| 7  | Latrine     | <i>beta-giardin</i> | none | 4 | 15711 | 2  | 15709 | 1.27E-04 |
| 8  | Latrine     | <i>beta-giardin</i> | none | 4 | 13504 | 0  | 13504 | 0.00E+00 |
| 9  | Latrine     | <i>beta-giardin</i> | none | 4 | 11617 | 0  | 11617 | 0.00E+00 |

|    |         |                     |      |   |       |    |       |          |
|----|---------|---------------------|------|---|-------|----|-------|----------|
| 10 | Latrine | <i>beta-giardin</i> | none | 4 | 12410 | 5  | 12405 | 4.03E-04 |
| 11 | Latrine | <i>beta-giardin</i> | none | 4 | 11951 | 6  | 11945 | 5.02E-04 |
| 12 | Latrine | <i>beta-giardin</i> | none | 4 | 12395 | 0  | 12395 | 0.00E+00 |
| 13 | Latrine | <i>beta-giardin</i> | none | 4 | 11238 | 8  | 11230 | 7.12E-04 |
| 14 | Latrine | <i>beta-giardin</i> | none | 4 | 12709 | 32 | 12677 | 2.52E-03 |
| 15 | Latrine | <i>beta-giardin</i> | none | 4 | 11906 | 1  | 11905 | 8.40E-05 |
| 16 | Latrine | <i>beta-giardin</i> | none | 4 | 13375 | 0  | 13375 | 0.00E+00 |
| 17 | Latrine | <i>beta-giardin</i> | none | 4 | 13259 | 0  | 13259 | 0.00E+00 |
| 18 | Latrine | <i>beta-giardin</i> | none | 4 | 12289 | 2  | 12287 | 1.63E-04 |
| 19 | Latrine | <i>beta-giardin</i> | none | 4 | 10313 | 0  | 10313 | 0.00E+00 |
| 20 | Latrine | <i>beta-giardin</i> | none | 4 | 11595 | 0  | 11595 | 0.00E+00 |
| 21 | Latrine | <i>beta-giardin</i> | none | 4 | 13687 | 4  | 13683 | 2.92E-04 |
| 22 | Latrine | <i>beta-giardin</i> | none | 4 | 12618 | 4  | 12614 | 3.17E-04 |
| 23 | Latrine | <i>beta-giardin</i> | none | 4 | 9317  | 0  | 9317  | 0.00E+00 |
| 24 | Latrine | <i>beta-giardin</i> | none | 4 | 14103 | 0  | 14103 | 0.00E+00 |
| 25 | Latrine | <i>beta-giardin</i> | none | 4 | 12976 | 33 | 12943 | 2.55E-03 |
| 26 | Latrine | <i>beta-giardin</i> | none | 4 | 13623 | 3  | 13620 | 2.20E-04 |
| 27 | Latrine | <i>beta-giardin</i> | none | 4 | 14291 | 1  | 14290 | 7.00E-05 |
| 28 | Latrine | <i>beta-giardin</i> | none | 4 | 9654  | 1  | 9653  | 1.04E-04 |
| 29 | Latrine | <i>beta-giardin</i> | none | 4 | 11393 | 16 | 11377 | 1.41E-03 |
| 30 | Latrine | <i>beta-giardin</i> | none | 4 | 9548  | 3  | 9545  | 3.14E-04 |

|    |             |                     |      |   |       |    |       |          |
|----|-------------|---------------------|------|---|-------|----|-------|----------|
| 1  | Solid waste | <i>beta-giardin</i> | none | 4 | 16651 | 1  | 16650 | 6.01E-05 |
| 2  | Solid waste | <i>beta-giardin</i> | none | 4 | 12627 | 8  | 12619 | 6.34E-04 |
| 3  | Solid waste | <i>beta-giardin</i> | none | 4 | 15515 | 0  | 15515 | 0.00E+00 |
| 4  | Solid waste | <i>beta-giardin</i> | none | 4 | 16374 | 0  | 16374 | 0.00E+00 |
| 5  | Solid waste | <i>beta-giardin</i> | none | 4 | 10867 | 0  | 10867 | 0.00E+00 |
| 6  | Solid waste | <i>beta-giardin</i> | none | 4 | 15988 | 0  | 15988 | 0.00E+00 |
| 7  | Solid waste | <i>beta-giardin</i> | none | 4 | 15880 | 2  | 15878 | 1.26E-04 |
| 8  | Solid waste | <i>beta-giardin</i> | none | 4 | 12425 | 6  | 12419 | 4.83E-04 |
| 9  | Solid waste | <i>beta-giardin</i> | none | 4 | 16851 | 0  | 16851 | 0.00E+00 |
| 10 | Solid waste | <i>beta-giardin</i> | none | 4 | 11960 | 1  | 11959 | 8.36E-05 |
| 11 | Solid waste | <i>beta-giardin</i> | none | 4 | 12602 | 12 | 12590 | 9.53E-04 |
| 12 | Solid waste | <i>beta-giardin</i> | none | 4 | 13966 | 11 | 13955 | 7.88E-04 |
| 13 | Solid waste | <i>beta-giardin</i> | none | 4 | 14523 | 10 | 14513 | 6.89E-04 |
| 14 | Solid waste | <i>beta-giardin</i> | none | 4 | 14396 | 2  | 14394 | 1.39E-04 |
| 15 | Solid waste | <i>beta-giardin</i> | none | 4 | 15559 | 14 | 15545 | 9.00E-04 |
| 16 | Solid waste | <i>beta-giardin</i> | none | 4 | 13587 | 1  | 13586 | 7.36E-05 |
| 17 | Solid waste | <i>beta-giardin</i> | none | 4 | 13485 | 0  | 13485 | 0.00E+00 |
| 18 | Solid waste | <i>beta-giardin</i> | none | 4 | 13312 | 54 | 13258 | 4.06E-03 |
| 19 | Solid waste | <i>beta-giardin</i> | none | 4 | 9024  | 0  | 9024  | 0.00E+00 |
| 20 | Solid waste | <i>beta-giardin</i> | none | 4 | 13121 | 1  | 13120 | 7.62E-05 |
| 21 | Solid waste | <i>beta-giardin</i> | none | 4 | 8818  | 0  | 8818  | 0.00E+00 |

|    |             |                     |      |   |       |     |       |          |
|----|-------------|---------------------|------|---|-------|-----|-------|----------|
| 22 | Solid waste | <i>beta-giardin</i> | none | 4 | 13890 | 0   | 13890 | 0.00E+00 |
| 23 | Solid waste | <i>beta-giardin</i> | none | 4 | 16237 | 0   | 16237 | 0.00E+00 |
| 24 | Solid waste | <i>beta-giardin</i> | none | 4 | 15245 | 0   | 15245 | 0.00E+00 |
| 25 | Solid waste | <i>beta-giardin</i> | none | 4 | 13517 | 0   | 13517 | 0.00E+00 |
| 26 | Solid waste | <i>beta-giardin</i> | none | 4 | 16424 | 0   | 16424 | 0.00E+00 |
| 27 | Solid waste | <i>beta-giardin</i> | none | 4 | 14232 | 13  | 14219 | 9.14E-04 |
| 28 | Solid waste | <i>beta-giardin</i> | none | 4 | 12493 | 0   | 12493 | 0.00E+00 |
| 29 | Solid waste | <i>beta-giardin</i> | none | 4 | 12582 | 29  | 12553 | 2.31E-03 |
| 30 | Solid waste | <i>beta-giardin</i> | none | 4 | 10231 | 0   | 10231 | 0.00E+00 |
| 1  | Dishwashing | <i>ipaH</i>         | none | 4 | 10205 | 19  | 10186 | 1.86E-03 |
| 2  | Dishwashing | <i>ipaH</i>         | none | 4 | 12649 | 19  | 12630 | 1.50E-03 |
| 3  | Dishwashing | <i>ipaH</i>         | none | 4 | 15098 | 7   | 15091 | 4.64E-04 |
| 4  | Dishwashing | <i>ipaH</i>         | none | 4 | 16470 | 0   | 16470 | 0.00E+00 |
| 5  | Dishwashing | <i>ipaH</i>         | none | 4 | 17697 | 1   | 17696 | 5.65E-05 |
| 6  | Dishwashing | <i>ipaH</i>         | none | 4 | 18042 | 39  | 18003 | 2.16E-03 |
| 7  | Dishwashing | <i>ipaH</i>         | none | 4 | 14503 | 10  | 14493 | 6.90E-04 |
| 8  | Dishwashing | <i>ipaH</i>         | none | 4 | 15766 | 3   | 15763 | 1.90E-04 |
| 9  | Dishwashing | <i>ipaH</i>         | none | 4 | 14804 | 141 | 14663 | 9.57E-03 |
| 10 | Dishwashing | <i>ipaH</i>         | none | 4 | 15758 | 2   | 15756 | 1.27E-04 |
| 11 | Dishwashing | <i>ipaH</i>         | none | 4 | 15316 | 2   | 15314 | 1.31E-04 |
| 12 | Dishwashing | <i>ipaH</i>         | none | 4 | 16136 | 1   | 16135 | 6.20E-05 |

|    |             |             |      |   |       |    |       |          |
|----|-------------|-------------|------|---|-------|----|-------|----------|
| 13 | Dishwashing | <i>ipaH</i> | none | 4 | 13876 | 51 | 13825 | 3.68E-03 |
| 14 | Dishwashing | <i>ipaH</i> | none | 4 | 10317 | 0  | 10317 | 0.00E+00 |
| 15 | Dishwashing | <i>ipaH</i> | none | 4 | 13616 | 3  | 13613 | 2.20E-04 |
| 16 | Dishwashing | <i>ipaH</i> | none | 4 | 15605 | 5  | 15600 | 3.20E-04 |
| 17 | Dishwashing | <i>ipaH</i> | none | 4 | 16352 | 0  | 16352 | 0.00E+00 |
| 18 | Dishwashing | <i>ipaH</i> | none | 4 | 16051 | 89 | 15962 | 5.56E-03 |
| 19 | Dishwashing | <i>ipaH</i> | none | 4 | 9661  | 7  | 9654  | 7.25E-04 |
| 20 | Dishwashing | <i>ipaH</i> | none | 4 | 16580 | 1  | 16579 | 6.03E-05 |
| 21 | Dishwashing | <i>ipaH</i> | none | 4 | 15564 | 19 | 15545 | 1.22E-03 |
| 22 | Dishwashing | <i>ipaH</i> | none | 4 | 13099 | 0  | 13099 | 0.00E+00 |
| 23 | Dishwashing | <i>ipaH</i> | none | 4 | 11944 | 2  | 11942 | 1.67E-04 |
| 24 | Dishwashing | <i>ipaH</i> | none | 4 | 15370 | 1  | 15369 | 6.51E-05 |
| 25 | Dishwashing | <i>ipaH</i> | none | 4 | 14452 | 1  | 14451 | 6.92E-05 |
| 26 | Dishwashing | <i>ipaH</i> | none | 4 | 15727 | 0  | 15727 | 0.00E+00 |
| 27 | Dishwashing | <i>ipaH</i> | none | 4 | 15077 | 0  | 15077 | 0.00E+00 |
| 28 | Dishwashing | <i>ipaH</i> | none | 4 | 16857 | 0  | 16857 | 0.00E+00 |
| 29 | Dishwashing | <i>ipaH</i> | none | 4 | 10041 | 19 | 10022 | 1.89E-03 |
| 30 | Dishwashing | <i>ipaH</i> | none | 4 | 14182 | 0  | 14182 | 0.00E+00 |
| 1  | Latrine     | <i>ipaH</i> | none | 4 | 12365 | 3  | 12362 | 2.43E-04 |
| 2  | Latrine     | <i>ipaH</i> | none | 4 | 10049 | 0  | 10049 | 0.00E+00 |
| 3  | Latrine     | <i>ipaH</i> | none | 4 | 10140 | 21 | 10119 | 2.07E-03 |



|    |         |             |      |   |       |      |       |          |
|----|---------|-------------|------|---|-------|------|-------|----------|
| 4  | Latrine | <i>ipaH</i> | none | 4 | 16987 | 0    | 16987 | 0.00E+00 |
| 5  | Latrine | <i>ipaH</i> | none | 4 | 12900 | 8    | 12892 | 6.20E-04 |
| 6  | Latrine | <i>ipaH</i> | none | 4 | 15469 | 0    | 15469 | 0.00E+00 |
| 7  | Latrine | <i>ipaH</i> | none | 4 | 10468 | 3    | 10465 | 2.87E-04 |
| 8  | Latrine | <i>ipaH</i> | none | 4 | 17184 | 2    | 17182 | 1.16E-04 |
| 9  | Latrine | <i>ipaH</i> | none | 4 | 17750 | 0    | 17750 | 0.00E+00 |
| 10 | Latrine | <i>ipaH</i> | none | 4 | 15320 | 2    | 15318 | 1.31E-04 |
| 11 | Latrine | <i>ipaH</i> | none | 4 | 3242  | 34   | 3208  | 1.05E-02 |
| 12 | Latrine | <i>ipaH</i> | none | 4 | 17409 | 2    | 17407 | 1.15E-04 |
| 13 | Latrine | <i>ipaH</i> | none | 4 | 11313 | 15   | 11298 | 1.33E-03 |
| 14 | Latrine | <i>ipaH</i> | none | 4 | 14775 | 1    | 14774 | 6.77E-05 |
| 15 | Latrine | <i>ipaH</i> | none | 4 | 18085 | 6    | 18079 | 3.32E-04 |
| 16 | Latrine | <i>ipaH</i> | none | 4 | 8962  | 0    | 8962  | 0.00E+00 |
| 17 | Latrine | <i>ipaH</i> | none | 4 | 16257 | 0    | 16257 | 0.00E+00 |
| 18 | Latrine | <i>ipaH</i> | none | 4 | 16527 | 3    | 16524 | 1.82E-04 |
| 19 | Latrine | <i>ipaH</i> | none | 4 | 14823 | 151  | 14672 | 1.02E-02 |
| 20 | Latrine | <i>ipaH</i> | none | 4 | 17267 | 2039 | 15228 | 1.26E-01 |
| 21 | Latrine | <i>ipaH</i> | none | 4 | 10459 | 1    | 10458 | 9.56E-05 |
| 22 | Latrine | <i>ipaH</i> | none | 4 | 10450 | 30   | 10420 | 2.87E-03 |
| 23 | Latrine | <i>ipaH</i> | none | 4 | 14492 | 39   | 14453 | 2.69E-03 |
| 24 | Latrine | <i>ipaH</i> | none | 4 | 14906 | 2    | 14904 | 1.34E-04 |

|    |             |             |      |   |       |     |       |          |
|----|-------------|-------------|------|---|-------|-----|-------|----------|
| 25 | Latrine     | <i>ipaH</i> | none | 4 | 13861 | 14  | 13847 | 1.01E-03 |
| 26 | Latrine     | <i>ipaH</i> | none | 4 | 13966 | 122 | 13844 | 8.77E-03 |
| 27 | Latrine     | <i>ipaH</i> | none | 4 | 18856 | 0   | 18856 | 0.00E+00 |
| 28 | Latrine     | <i>ipaH</i> | none | 4 | 7697  | 59  | 7638  | 7.69E-03 |
| 29 | Latrine     | <i>ipaH</i> | none | 4 | 17512 | 5   | 17507 | 2.86E-04 |
| 30 | Latrine     | <i>ipaH</i> | none | 4 | 17429 | 3   | 17426 | 1.72E-04 |
| 1  | Solid waste | <i>ipaH</i> | none | 4 | 11762 | 0   | 11762 | 0.00E+00 |
| 2  | Solid waste | <i>ipaH</i> | none | 4 | 13879 | 2   | 13877 | 1.44E-04 |
| 3  | Solid waste | <i>ipaH</i> | none | 4 | 16628 | 0   | 16628 | 0.00E+00 |
| 4  | Solid waste | <i>ipaH</i> | none | 4 | 16650 | 6   | 16644 | 3.60E-04 |
| 5  | Solid waste | <i>ipaH</i> | none | 4 | 15766 | 0   | 15766 | 0.00E+00 |
| 6  | Solid waste | <i>ipaH</i> | none | 4 | 15099 | 0   | 15099 | 0.00E+00 |
| 7  | Solid waste | <i>ipaH</i> | none | 4 | 12466 | 0   | 12466 | 0.00E+00 |
| 8  | Solid waste | <i>ipaH</i> | none | 4 | 11694 | 1   | 11693 | 8.55E-05 |
| 9  | Solid waste | <i>ipaH</i> | none | 4 | 15093 | 31  | 15062 | 2.06E-03 |
| 10 | Solid waste | <i>ipaH</i> | none | 4 | 12844 | 15  | 12829 | 1.17E-03 |
| 11 | Solid waste | <i>ipaH</i> | none | 4 | 15677 | 9   | 15668 | 5.74E-04 |
| 12 | Solid waste | <i>ipaH</i> | none | 4 | 17178 | 19  | 17159 | 1.11E-03 |
| 13 | Solid waste | <i>ipaH</i> | none | 4 | 10389 | 0   | 10389 | 0.00E+00 |
| 14 | Solid waste | <i>ipaH</i> | none | 4 | 16955 | 0   | 16955 | 0.00E+00 |
| 15 | Solid waste | <i>ipaH</i> | none | 4 | 16393 | 2   | 16391 | 1.22E-04 |

|    |             |             |       |   |       |     |       |          |
|----|-------------|-------------|-------|---|-------|-----|-------|----------|
| 16 | Solid waste | <i>ipaH</i> | none  | 4 | 9289  | 0   | 9289  | 0.00E+00 |
| 17 | Solid waste | <i>ipaH</i> | none  | 4 | 17644 | 0   | 17644 | 0.00E+00 |
| 18 | Solid waste | <i>ipaH</i> | none  | 4 | 15486 | 0   | 15486 | 0.00E+00 |
| 19 | Solid waste | <i>ipaH</i> | none  | 4 | 15492 | 1   | 15491 | 6.46E-05 |
| 20 | Solid waste | <i>ipaH</i> | none  | 4 | 6523  | 1   | 6522  | 1.53E-04 |
| 21 | Solid waste | <i>ipaH</i> | none  | 4 | 17474 | 0   | 17474 | 0.00E+00 |
| 22 | Solid waste | <i>ipaH</i> | none  | 4 | 16871 | 1   | 16870 | 5.93E-05 |
| 23 | Solid waste | <i>ipaH</i> | none  | 4 | 15375 | 72  | 15303 | 4.69E-03 |
| 24 | Solid waste | <i>ipaH</i> | none  | 4 | 18325 | 0   | 18325 | 0.00E+00 |
| 25 | Solid waste | <i>ipaH</i> | none  | 4 | 15194 | 6   | 15188 | 3.95E-04 |
| 26 | Solid waste | <i>ipaH</i> | none  | 4 | 19094 | 15  | 19079 | 7.86E-04 |
| 27 | Solid waste | <i>ipaH</i> | none  | 4 | 13292 | 0   | 13292 | 0.00E+00 |
| 28 | Solid waste | <i>ipaH</i> | none  | 4 | 17125 | 2   | 17123 | 1.17E-04 |
| 29 | Solid waste | <i>ipaH</i> | none  | 4 | 10070 | 0   | 10070 | 0.00E+00 |
| 30 | Solid waste | <i>ipaH</i> | none  | 4 | 16432 | 17  | 16415 | 1.04E-03 |
| 1  | Dishwashing | <i>ybbW</i> | 1:100 | 1 | 15536 | 88  | 15448 | 5.68E-03 |
| 2  | Dishwashing | <i>ybbW</i> | 1:100 | 1 | 16221 | 130 | 16091 | 8.05E-03 |
| 3  | Dishwashing | <i>ybbW</i> | 1:100 | 1 | 16270 | 99  | 16171 | 6.10E-03 |
| 4  | Dishwashing | <i>ybbW</i> | 1:100 | 1 | 17060 | 114 | 16946 | 6.70E-03 |
| 5  | Dishwashing | <i>ybbW</i> | 1:100 | 1 | 17640 | 481 | 17159 | 2.76E-02 |
| 6  | Dishwashing | <i>ybbW</i> | 1:100 | 1 | 15951 | 199 | 15752 | 1.26E-02 |

|    |             |             |       |   |       |     |       |          |
|----|-------------|-------------|-------|---|-------|-----|-------|----------|
| 7  | Dishwashing | <i>ybbW</i> | 1:100 | 1 | 16918 | 116 | 16802 | 6.88E-03 |
| 8  | Dishwashing | <i>ybbW</i> | 1:100 | 1 | 15048 | 67  | 14981 | 4.46E-03 |
| 9  | Dishwashing | <i>ybbW</i> | 1:100 | 1 | 17798 | 169 | 17629 | 9.54E-03 |
| 10 | Dishwashing | <i>ybbW</i> | 1:100 | 1 | 17522 | 79  | 17443 | 4.52E-03 |
| 11 | Dishwashing | <i>ybbW</i> | 1:100 | 1 | 18942 | 86  | 18856 | 4.55E-03 |
| 12 | Dishwashing | <i>ybbW</i> | 1:100 | 1 | 18870 | 70  | 18800 | 3.72E-03 |
| 13 | Dishwashing | <i>ybbW</i> | 1:100 | 1 | 17086 | 67  | 17019 | 3.93E-03 |
| 14 | Dishwashing | <i>ybbW</i> | 1:100 | 1 | 15947 | 118 | 15829 | 7.43E-03 |
| 15 | Dishwashing | <i>ybbW</i> | 1:100 | 1 | 16103 | 68  | 16035 | 4.23E-03 |
| 16 | Dishwashing | <i>ybbW</i> | 1:100 | 1 | 17319 | 171 | 17148 | 9.92E-03 |
| 17 | Dishwashing | <i>ybbW</i> | 1:100 | 1 | 16124 | 134 | 15990 | 8.35E-03 |
| 18 | Dishwashing | <i>ybbW</i> | 1:100 | 1 | 17447 | 145 | 17302 | 8.35E-03 |
| 19 | Dishwashing | <i>ybbW</i> | 1:100 | 1 | 12442 | 18  | 12424 | 1.45E-03 |
| 20 | Dishwashing | <i>ybbW</i> | 1:100 | 1 | 15881 | 188 | 15693 | 1.19E-02 |
| 21 | Dishwashing | <i>ybbW</i> | 1:100 | 1 | 13833 | 42  | 13791 | 3.04E-03 |
| 22 | Dishwashing | <i>ybbW</i> | 1:100 | 1 | 16239 | 177 | 16062 | 1.10E-02 |
| 23 | Dishwashing | <i>ybbW</i> | 1:100 | 1 | 15386 | 74  | 15312 | 4.82E-03 |
| 24 | Dishwashing | <i>ybbW</i> | 1:100 | 1 | 16769 | 154 | 16615 | 9.23E-03 |
| 25 | Dishwashing | <i>ybbW</i> | 1:100 | 1 | 9864  | 88  | 9776  | 8.96E-03 |
| 26 | Dishwashing | <i>ybbW</i> | 1:100 | 1 | 17611 | 98  | 17513 | 5.58E-03 |
| 27 | Dishwashing | <i>ybbW</i> | 1:100 | 1 | 16073 | 54  | 16019 | 3.37E-03 |

|    |             |             |       |   |       |      |       |          |
|----|-------------|-------------|-------|---|-------|------|-------|----------|
| 28 | Dishwashing | <i>ybbW</i> | 1:100 | 1 | 5526  | 7    | 5519  | 1.27E-03 |
| 29 | Dishwashing | <i>ybbW</i> | 1:100 | 1 | 16185 | 54   | 16131 | 3.34E-03 |
| 30 | Dishwashing | <i>ybbW</i> | 1:100 | 1 | 18489 | 83   | 18406 | 4.50E-03 |
| 1  | Latrine     | <i>ybbW</i> | None  | 1 | 14037 | 2692 | 11345 | 2.13E-01 |
| 2  | Latrine     | <i>ybbW</i> | 1:100 | 2 | 13096 | 71   | 13025 | 5.44E-03 |
| 3  | Latrine     | <i>ybbW</i> | 1:100 | 2 | 12363 | 112  | 12251 | 9.10E-03 |
| 4  | Latrine     | <i>ybbW</i> | None  | 1 | 15427 | 1437 | 13990 | 9.78E-02 |
| 5  | Latrine     | <i>ybbW</i> | None  | 1 | 16347 | 3097 | 13250 | 2.10E-01 |
| 6  | Latrine     | <i>ybbW</i> | 1:100 | 2 | 11594 | 569  | 11025 | 5.03E-02 |
| 7  | Latrine     | <i>ybbW</i> | None  | 1 | 12699 | 2815 | 9884  | 2.51E-01 |
| 8  | Latrine     | <i>ybbW</i> | None  | 1 | 14116 | 3290 | 10826 | 2.65E-01 |
| 9  | Latrine     | <i>ybbW</i> | None  | 1 | 13419 | 1263 | 12156 | 9.88E-02 |
| 10 | Latrine     | <i>ybbW</i> | 1:100 | 1 | 16851 | 59   | 16792 | 3.51E-03 |
| 11 | Latrine     | <i>ybbW</i> | 1:100 | 1 | 18061 | 154  | 17907 | 8.56E-03 |
| 12 | Latrine     | <i>ybbW</i> | 1:100 | 1 | 16509 | 49   | 16460 | 2.97E-03 |
| 13 | Latrine     | <i>ybbW</i> | 1:100 | 2 | 12630 | 30   | 12600 | 2.38E-03 |
| 14 | Latrine     | <i>ybbW</i> | None  | 1 | 14486 | 1924 | 12562 | 1.43E-01 |
| 15 | Latrine     | <i>ybbW</i> | None  | 1 | 14480 | 2796 | 11684 | 2.15E-01 |
| 16 | Latrine     | <i>ybbW</i> | None  | 1 | 13850 | 3703 | 10147 | 3.11E-01 |
| 17 | Latrine     | <i>ybbW</i> | 1:100 | 2 | 12062 | 138  | 11924 | 1.15E-02 |
| 18 | Latrine     | <i>ybbW</i> | None  | 1 | 14935 | 3993 | 10942 | 3.11E-01 |

|    |             |             |       |   |       |      |       |          |
|----|-------------|-------------|-------|---|-------|------|-------|----------|
| 19 | Latrine     | <i>ybbW</i> | 1:100 | 1 | 14485 | 100  | 14385 | 6.93E-03 |
| 20 | Latrine     | <i>ybbW</i> | None  | 1 | 15263 | 4550 | 10713 | 3.54E-01 |
| 21 | Latrine     | <i>ybbW</i> | None  | 1 | 11732 | 3076 | 8656  | 3.04E-01 |
| 22 | Latrine     | <i>ybbW</i> | None  | 1 | 12712 | 3654 | 9058  | 3.39E-01 |
| 23 | Latrine     | <i>ybbW</i> | None  | 1 | 15530 | 3389 | 12141 | 2.46E-01 |
| 24 | Latrine     | <i>ybbW</i> | 1:100 | 1 | 16405 | 194  | 16211 | 1.19E-02 |
| 25 | Latrine     | <i>ybbW</i> | 1:100 | 2 | 12921 | 158  | 12763 | 1.23E-02 |
| 26 | Latrine     | <i>ybbW</i> | None  | 1 | 17215 | 2780 | 14435 | 1.76E-01 |
| 27 | Latrine     | <i>ybbW</i> | None  | 1 | 15052 | 1902 | 13150 | 1.35E-01 |
| 28 | Latrine     | <i>ybbW</i> | None  | 1 | 15245 | 3402 | 11843 | 2.53E-01 |
| 29 | Latrine     | <i>ybbW</i> | 1:100 | 2 | 11530 | 23   | 11507 | 2.00E-03 |
| 30 | Latrine     | <i>ybbW</i> | None  | 1 | 13801 | 1662 | 12139 | 1.28E-01 |
| 1  | Solid waste | <i>ybbW</i> | 1:100 | 1 | 13466 | 43   | 13423 | 3.20E-03 |
| 2  | Solid waste | <i>ybbW</i> | 1:100 | 1 | 14498 | 47   | 14451 | 3.25E-03 |
| 3  | Solid waste | <i>ybbW</i> | 1:100 | 1 | 16257 | 13   | 16244 | 8.00E-04 |
| 4  | Solid waste | <i>ybbW</i> | 1:100 | 2 | 11285 | 35   | 11250 | 3.11E-03 |
| 5  | Solid waste | <i>ybbW</i> | None  | 1 | 16297 | 576  | 15721 | 3.60E-02 |
| 6  | Solid waste | <i>ybbW</i> | 1:100 | 2 | 13463 | 88   | 13375 | 6.56E-03 |
| 7  | Solid waste | <i>ybbW</i> | 1:100 | 1 | 12201 | 28   | 12173 | 2.30E-03 |
| 8  | Solid waste | <i>ybbW</i> | 1:100 | 1 | 13746 | 79   | 13667 | 5.76E-03 |
| 9  | Solid waste | <i>ybbW</i> | None  | 1 | 15955 | 1548 | 14407 | 1.02E-01 |

|    |             |             |       |   |       |      |       |          |
|----|-------------|-------------|-------|---|-------|------|-------|----------|
| 10 | Solid waste | <i>ybbW</i> | 1:100 | 2 | 12326 | 71   | 12255 | 5.78E-03 |
| 11 | Solid waste | <i>ybbW</i> | 1:100 | 2 | 13043 | 43   | 13000 | 3.30E-03 |
| 12 | Solid waste | <i>ybbW</i> | 1:100 | 2 | 14594 | 28   | 14566 | 1.92E-03 |
| 13 | Solid waste | <i>ybbW</i> | 1:100 | 1 | 14440 | 23   | 14417 | 1.59E-03 |
| 14 | Solid waste | <i>ybbW</i> | 1:100 | 1 | 15209 | 43   | 15166 | 2.83E-03 |
| 15 | Solid waste | <i>ybbW</i> | None  | 1 | 18347 | 1882 | 16465 | 1.08E-01 |
| 16 | Solid waste | <i>ybbW</i> | 1:100 | 1 | 14662 | 128  | 14534 | 8.77E-03 |
| 17 | Solid waste | <i>ybbW</i> | 1:100 | 2 | 12336 | 100  | 12236 | 8.14E-03 |
| 18 | Solid waste | <i>ybbW</i> | 1:100 | 1 | 12289 | 38   | 12251 | 3.10E-03 |
| 19 | Solid waste | <i>ybbW</i> | 1:100 | 2 | 12039 | 69   | 11970 | 5.75E-03 |
| 20 | Solid waste | <i>ybbW</i> | 1:100 | 1 | 13776 | 88   | 13688 | 6.41E-03 |
| 21 | Solid waste | <i>ybbW</i> | 1:100 | 1 | 18726 | 71   | 18655 | 3.80E-03 |
| 22 | Solid waste | <i>ybbW</i> | 1:100 | 1 | 15772 | 145  | 15627 | 9.24E-03 |
| 23 | Solid waste | <i>ybbW</i> | 1:100 | 1 | 17458 | 119  | 17339 | 6.84E-03 |
| 24 | Solid waste | <i>ybbW</i> | None  | 1 | 15208 | 599  | 14609 | 4.02E-02 |
| 25 | Solid waste | <i>ybbW</i> | 1:100 | 2 | 13891 | 44   | 13847 | 3.17E-03 |
| 26 | Solid waste | <i>ybbW</i> | None  | 1 | 15531 | 1377 | 14154 | 9.28E-02 |
| 27 | Solid waste | <i>ybbW</i> | 1:100 | 2 | 13008 | 43   | 12965 | 3.31E-03 |
| 28 | Solid waste | <i>ybbW</i> | 1:100 | 2 | 12721 | 34   | 12687 | 2.68E-03 |
| 29 | Solid waste | <i>ybbW</i> | 1:100 | 1 | 13811 | 33   | 13778 | 2.39E-03 |
| 30 | Solid waste | <i>ybbW</i> | None  | 1 | 11011 | 1515 | 9496  | 1.48E-01 |

92 \*Lambda =  $-\ln(1-(k/n))$  where k is the positive number of droplets and n is the total number of droplets



93 Figure S2. 95% LOD determination  
94

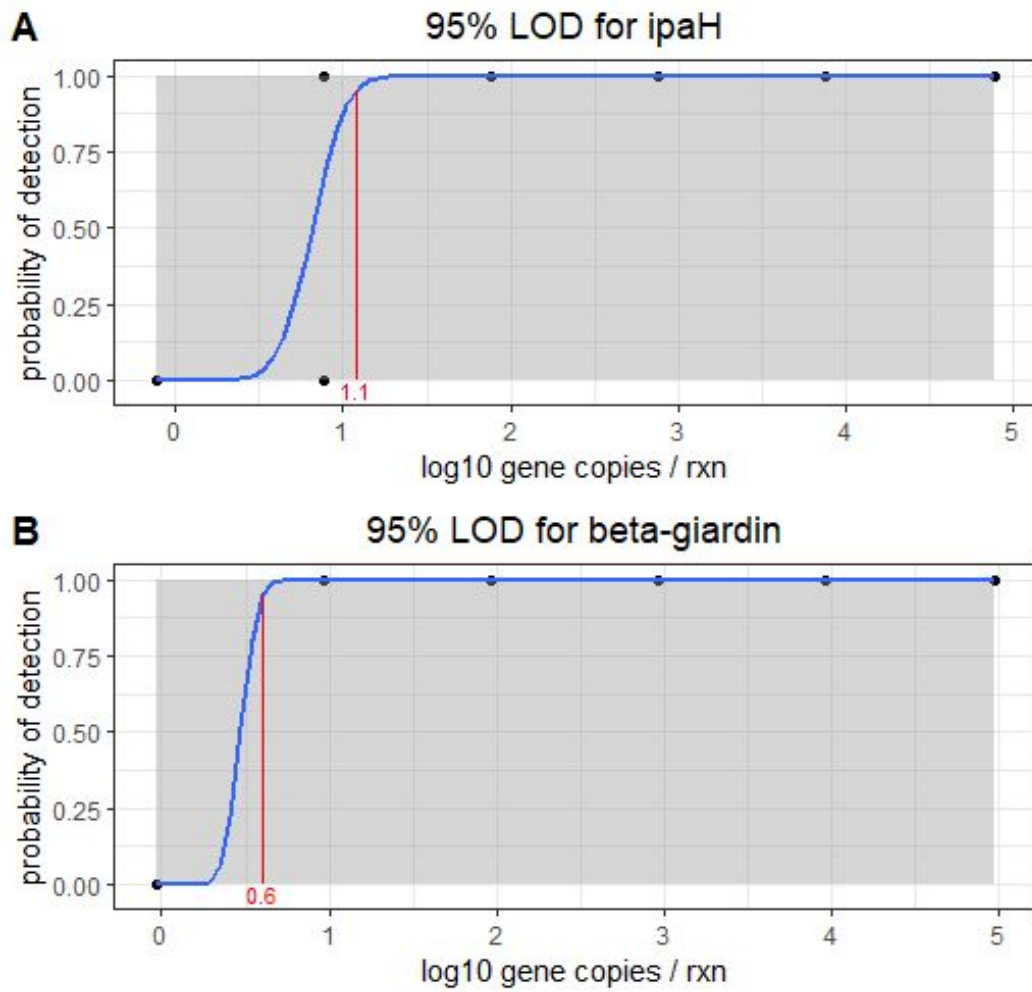

95  
96 Determined following the method of Stokdyk *et al.* 2016  
97  
98  
99  
100

101 Figure S3. Example of manual thresholding

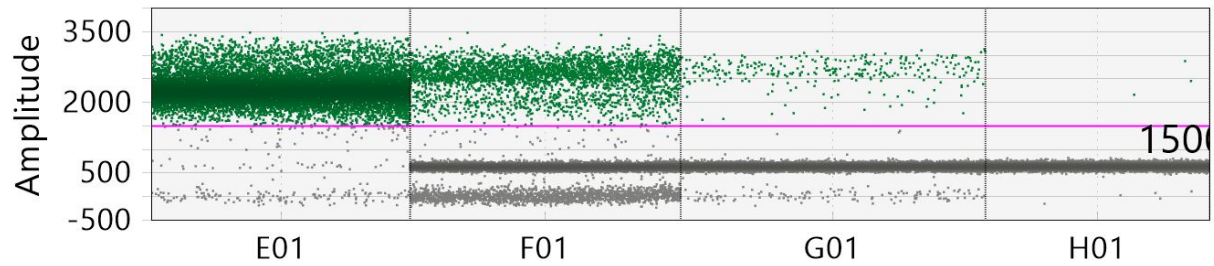

102

103 Example output of from manual thresholding in QuantaSoft (Version 1.0.596; Bio-Rad, Hercules, CA) for  
 104 the dilution series used to calculate the 95% LOD for the *ipaH* gene target. The amplitude on the y-axis  
 105 represents the measured fluorescent signal of each dot, which represents each measured droplet in the  
 106 ddPCR reaction. The vertical lines differentiate between the different wells. The pink horizontal line was  
 107 draw by the user via manual thresholding. As such, the green dots above the pink line are classified as  
 108 positive and the grey dots below are negative.

109

110 Figure S4. Example of ddPCR results

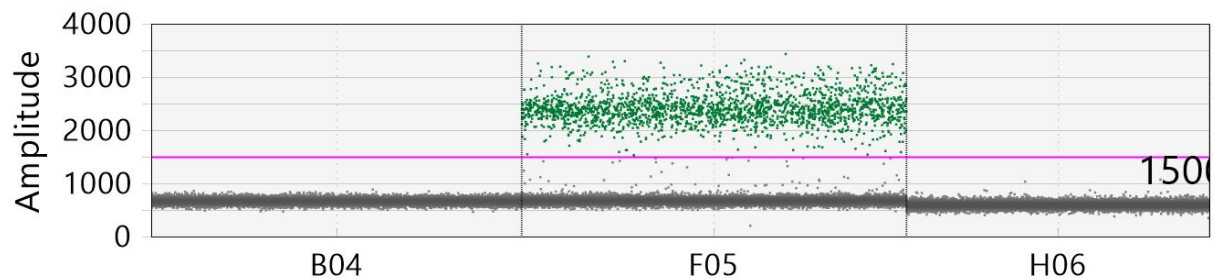

111

112 Well B04 is a no-template control. Well F05 is a sample that was positive for the *ipaH* gene target. Well  
 113 H06 is a negative extraction control.

114 Figure S5. Photos of compounds in urban Maputo, Mozambique

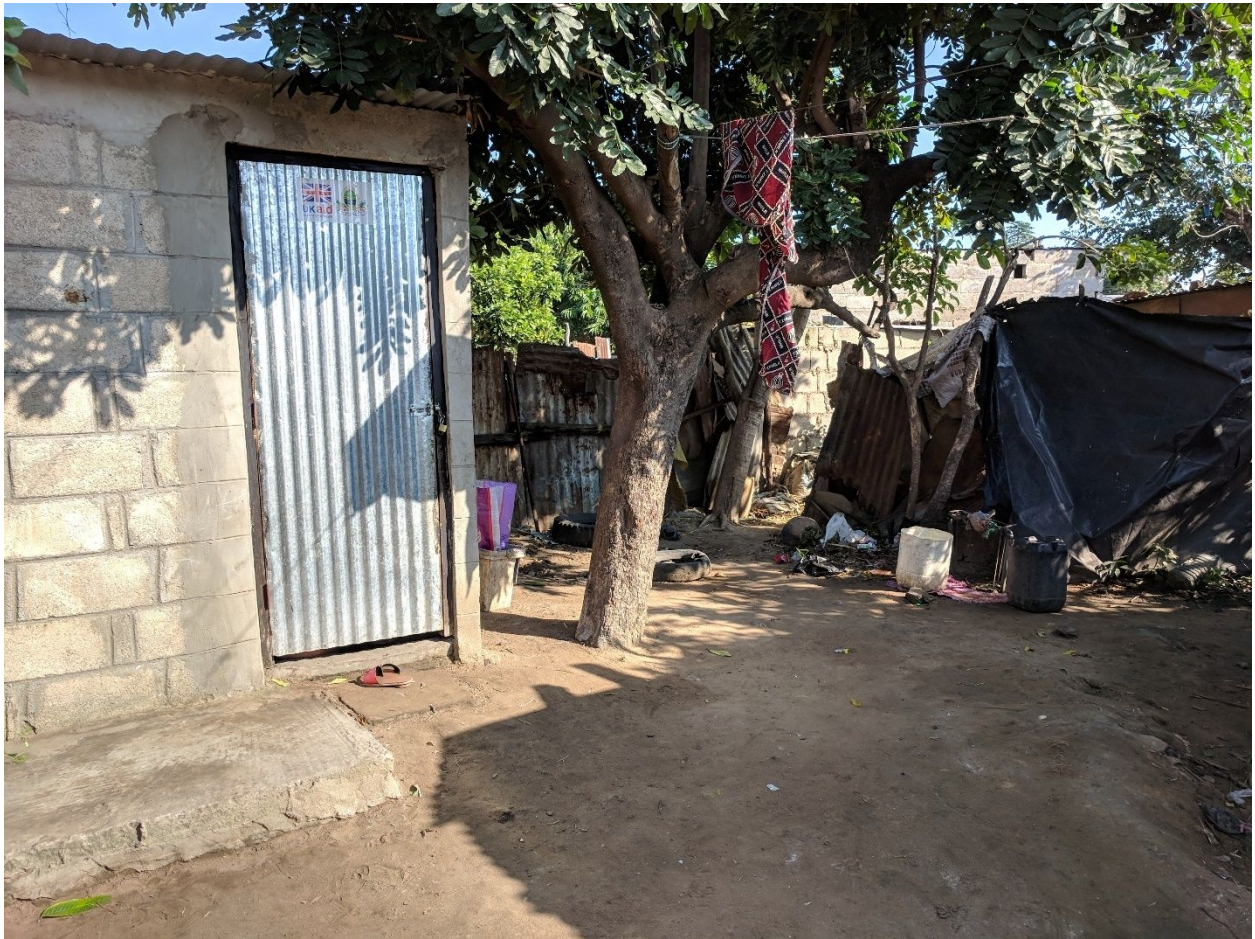

115

116 A latrine entrance

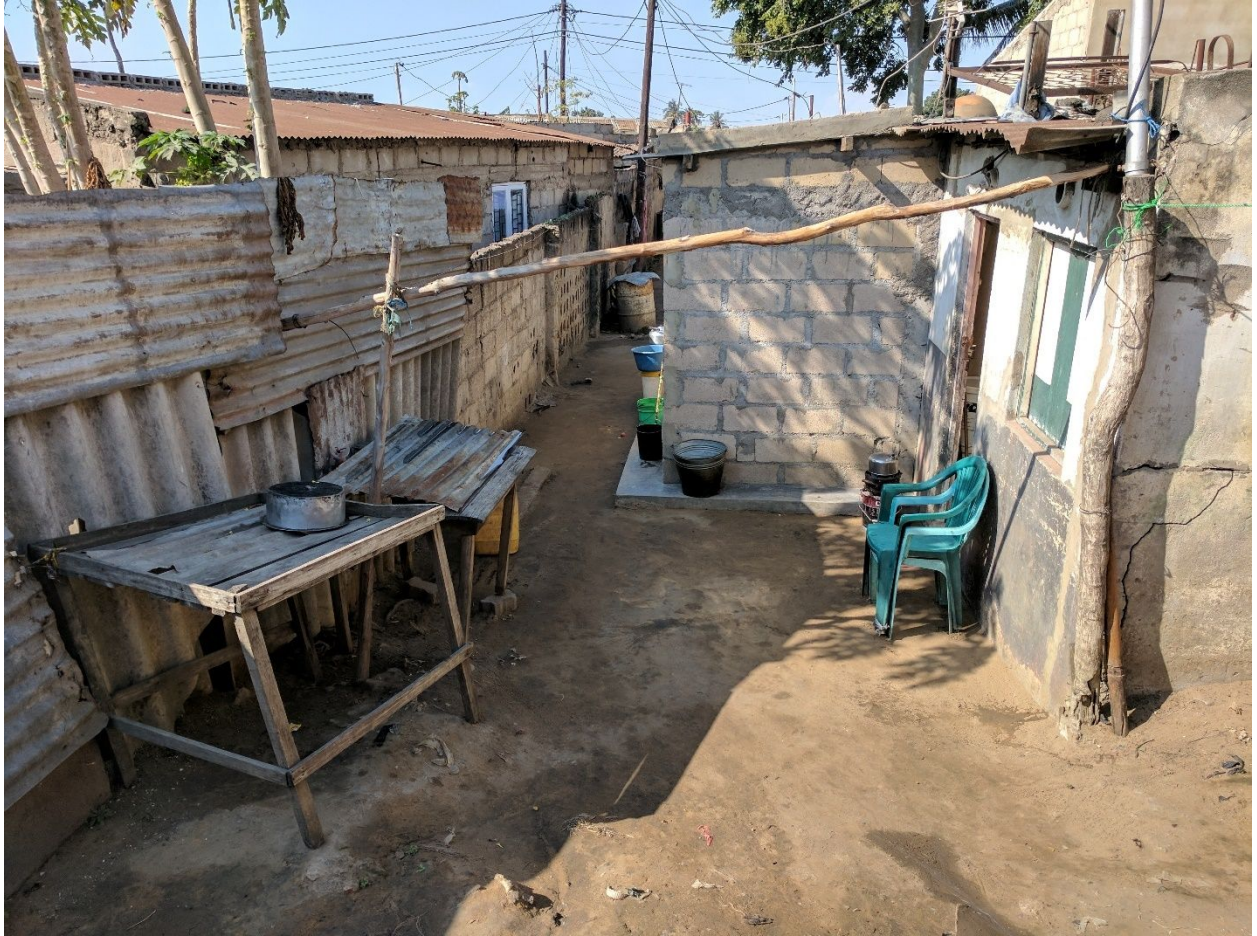

117

118 A dishwashing area

119

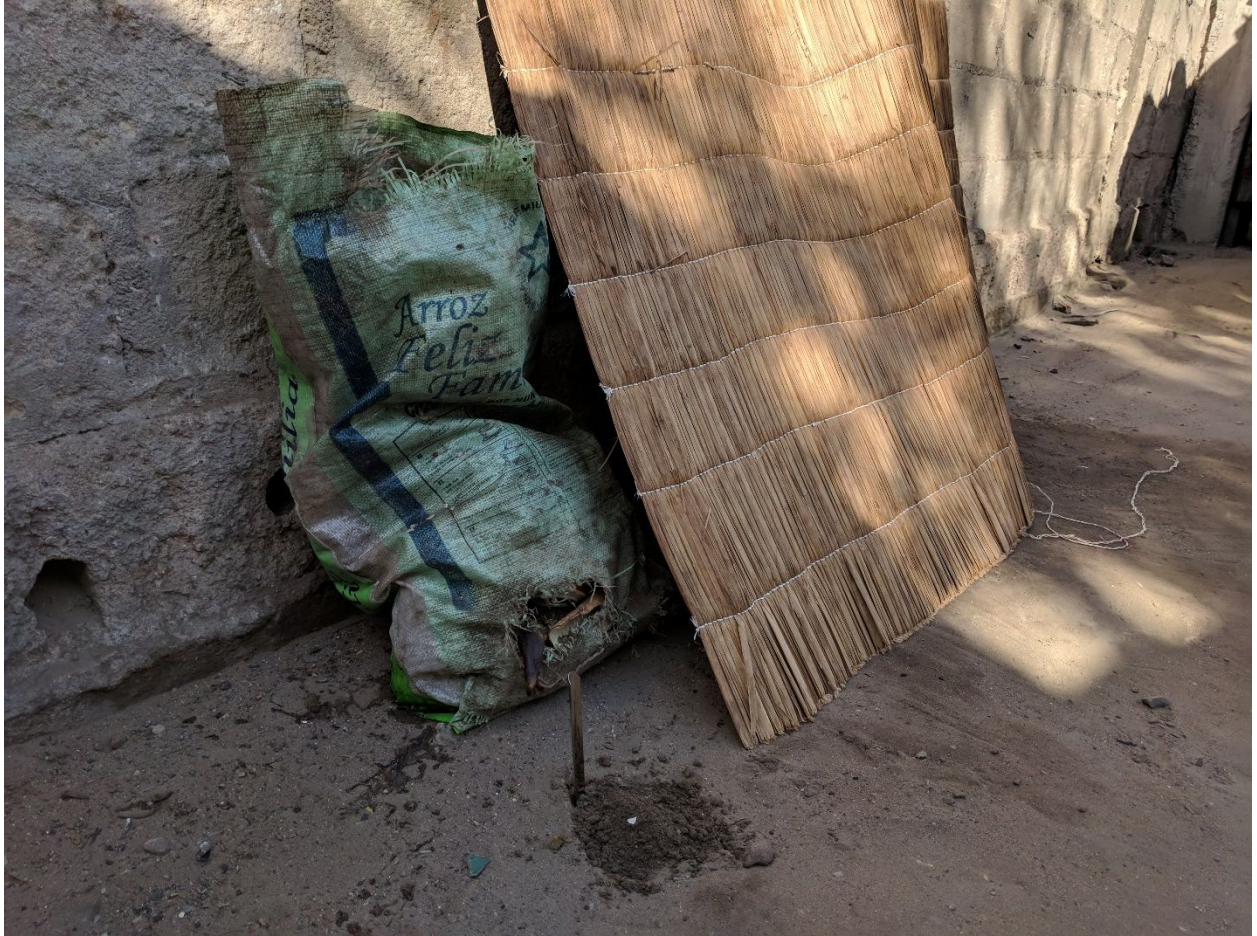

120

121 A solid waste storage area

122 Text S3  
123

## 124 Dose response harmonization and viability

125 Equation 1: For *Giardia duodenalis*

126

127 **dose<sub>Giardia</sub> (cysts / day) = *beta-giardin* (gene copies/gram soil) × 1 cyst / 16 gene copies ×**  
128 **(Viable<sub>E. coli</sub> / *ybbW*) × soil ingested (grams / day)**

129

130 Where:

131 ***beta-giardin*** is the density of the *beta-giardin* gene (gene copies / gram soil) stochastic

132 **Viable<sub>E. coli</sub>** is the culturable *E. coli* count observed in soils (CFU / gram soil), stochastic

133 ***ybbW*** is the density of the *ybbW* gene in soils (gene copies / gram soil), stochastic

134 **Soil ingested** is the amount of soil ingested per day (grams / day), stochastic

135

136 Equation 2: For *Shigella spp.*

137

138 **Dose<sub>Shigella</sub> (CFUs / day) = *ipaH* (gene copies/gram soil) × *ipaH*<sub>gene copies/genome</sub> × (Viable<sub>E. coli</sub> /**  
139 ***ybbW*) × soil ingested (grams / day)**

140

141 Where:

142 ***ipaH*** is the density of the *ipaH* gene (gene copies / gram soil) stochastic

143 ***ipaH*<sub>gene copies/genome</sub>** is the *ipaH* gene copies per *Shigella* genome, stochastic

144 **Viable<sub>E. coli</sub>** is the culturable *E. coli* count observed in soils (CFU / gram soil), stochastic

145 ***ybbW*** is the density of the *ybbW* gene in soils (gene copies / gram soil), stochastic

146 **Soil ingested** is the amount of soil ingested per day (grams / day), stochastic

147

## 148 Dose response equations

149 Equation 3: For *Giardia duodenalis*

150  **$P_{inf} = 1 - \exp(-k \cdot \text{dose})$**

151

152 Where:

153  **$P_{inf}$**  is the probability of infection

154 **k** is a parameter of the exponential model fit to dose response data (stochastic)

155 **dose** is the ingested dose of viable cysts (see equation 1), (stochastic)

156

157 Equation 4: For *Shigella spp.*

158  **$P_{inf} = 1 - [1 + \text{dose} \times (2^{1/a} - 1) / N_{50}]^{-a}$**

159 Where:

- 160  $P_{inf}$  is the probability of infection
- 161 **alpha** is parameter of the approximate beta Poisson model, stochastic
- 162  $N_{50}$  is the median infectious dose, stochastic
- 163 **dose** is the ingested dose of viable *Shigella* CFUs (see equation 2), stochastic
- 164
- 165
- 166

167 Table S8. Estimated daily risk of infection

| <b>Model output using soil ingestion estimates from US EPA Exposure Factors Handbook</b>  |              |                  |                  |                  |                         |
|-------------------------------------------------------------------------------------------|--------------|------------------|------------------|------------------|-------------------------|
| <b>Estimated daily risk of <i>Giardia duodenalis</i> infection (out of 10,000 people)</b> |              |                  |                  |                  |                         |
|                                                                                           | Percentile   | 10 <sup>th</sup> | 50 <sup>th</sup> | 90 <sup>th</sup> | MapSan point prevalence |
| <b>Age</b>                                                                                | <6 months    | 0.0016           | 0.087            | 4.4              | 13%                     |
|                                                                                           | 6-11 months  | 0.0024           | 0.13             | 7.3              | 22%                     |
|                                                                                           | 12-23 months | 0.0038           | 0.21             | 10.5             | 59%                     |
|                                                                                           | 24-71 months | 0.0017           | 0.097            | 5.8              | 73%                     |
| <b>Estimated daily risk of <i>Shigella</i> spp. infection</b>                             |              |                  |                  |                  |                         |
| <b>Age</b>                                                                                | <6 months    | 0.00075          | 0.037            | 2.0              | 5.0%                    |
|                                                                                           | 6-11 months  | 0.0011           | 0.058            | 3.2              | 21%                     |
|                                                                                           | 12-23 months | 0.0019           | 0.090            | 4.9              | 36%                     |
|                                                                                           | 24-71 months | 0.00078          | 0.047            | 2.7              | 68%                     |
| <b>Model output using soil ingestion estimates from Kwong <i>et al.</i></b>               |              |                  |                  |                  |                         |
| <b>Estimated daily risk of <i>Giardia duodenalis</i> infection (out of 10,000 people)</b> |              |                  |                  |                  |                         |
|                                                                                           | Percentile   | 10 <sup>th</sup> | 50 <sup>th</sup> | 90 <sup>th</sup> | MapSan point prevalence |
| <b>Age</b>                                                                                | 3-5 months   | 0.0078           | 0.44             | 23               | 13%                     |
|                                                                                           | 6-11 months  | 0.011            | 0.60             | 32               | 22%                     |
|                                                                                           | 12-23 months | 0.012            | 0.63             | 33               | 59%                     |
|                                                                                           | 24-35 month  | 0.0085           | 0.45             | 24               | 72%                     |
|                                                                                           | 36-47 months | 0.0082           | 0.46             | 24               | 75%                     |
| <b>Estimated daily risk of <i>Shigella</i> spp. infection</b>                             |              |                  |                  |                  |                         |
| <b>Age</b>                                                                                | 3-5 months   | 0.0036           | 0.19             | 10               | 5.0%                    |
|                                                                                           | 6-11 months  | 0.0052           | 0.27             | 14               | 21%                     |



|                                                                                           |                   |        |      |      |     |
|-------------------------------------------------------------------------------------------|-------------------|--------|------|------|-----|
|                                                                                           | 12-23 months      | 0.0054 | 0.28 | 15   | 36% |
|                                                                                           | 24-35 month       | 0.0040 | 0.20 | 11   | 56% |
|                                                                                           | 36-47 months      | 0.0041 | 0.21 | 11   | 73% |
| <b>Model output using geophagy estimates from Geissler <i>et al.</i></b>                  |                   |        |      |      |     |
| <b>Estimated daily risk of <i>Giardia duodenalis</i> infection (out of 10,000 people)</b> |                   |        |      |      |     |
|                                                                                           | <b>Percentile</b> | 10th   | 50th | 90th |     |
|                                                                                           | Geophagy          | 2.3    | 113  | 4500 |     |
| <b>Estimated daily risk of <i>Shigella</i> spp. infection</b>                             |                   |        |      |      |     |
|                                                                                           | Geophagy          | 1.1    | 52   | 1600 |     |

168

169

170

171 Figure S6. Sensitivity analysis graphs

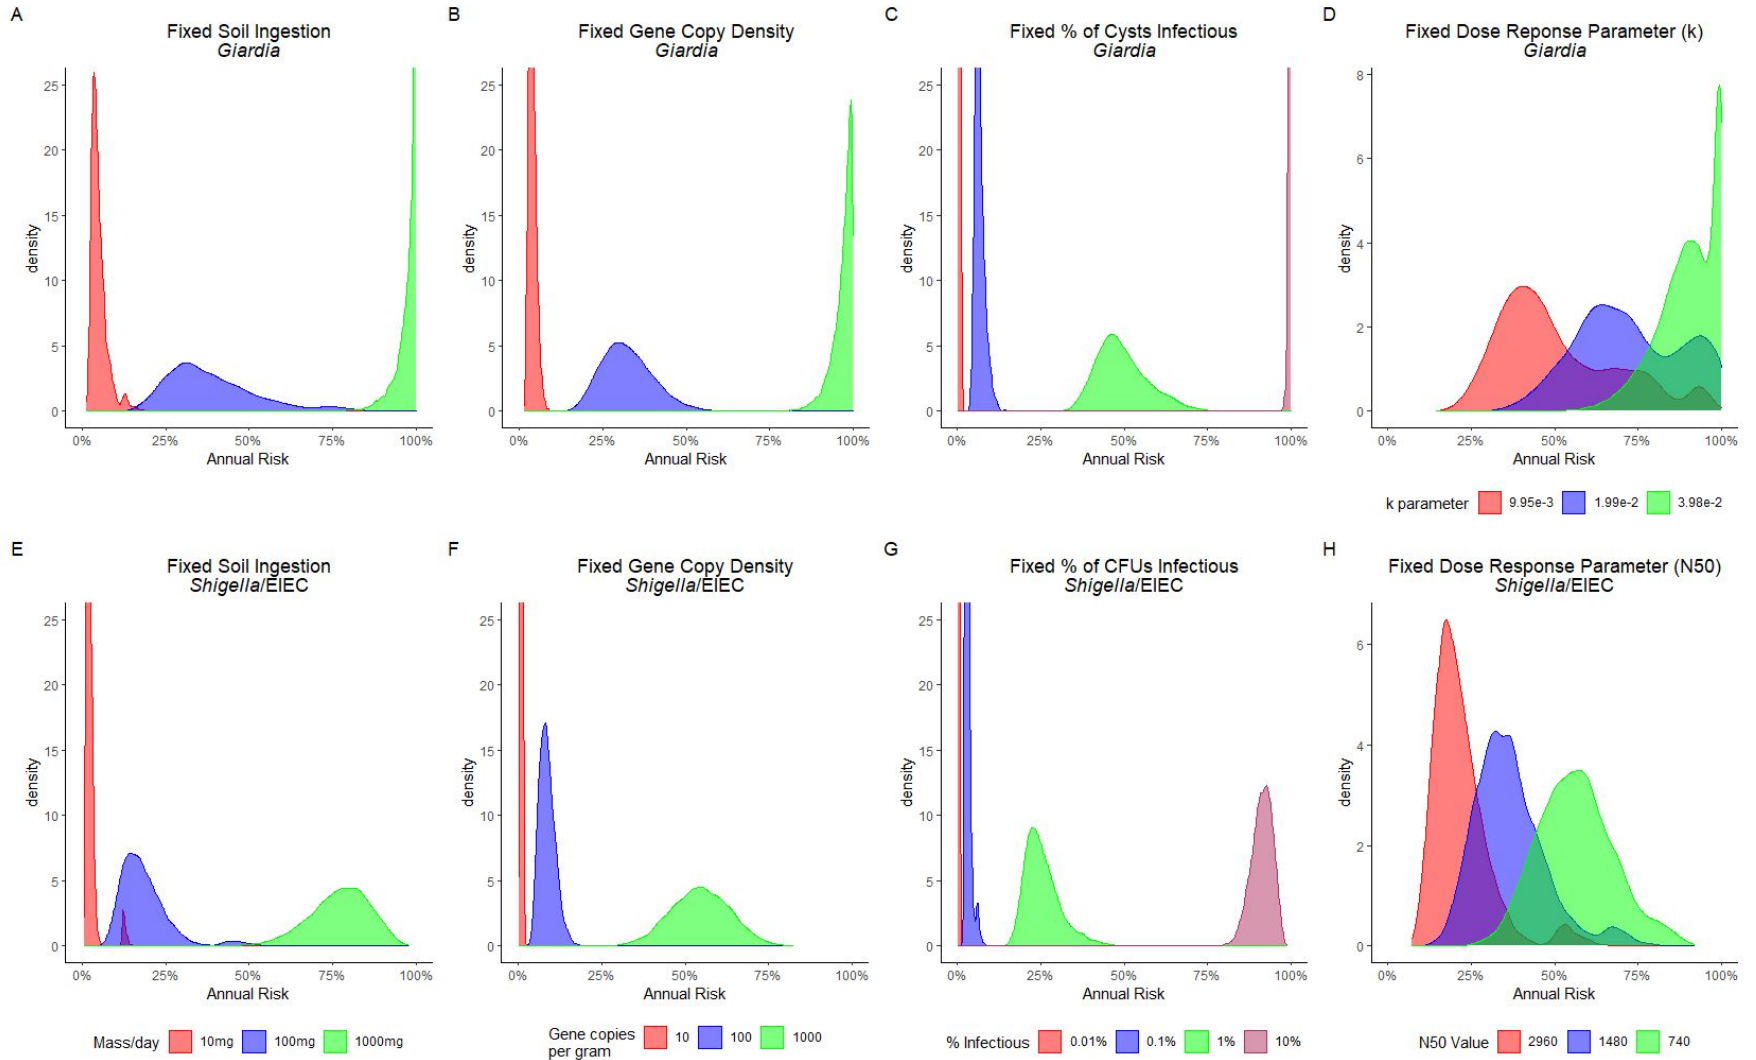

173 Results from sensitivity analysis that held individual parameters constant as part of the stochastic QMRA model. The stochastic  
174 parameters used are from Kwong *et al.* 2019 for children 12-23 months old

175 Table S9. Simulated dose reduction intervention

|                           | Dose reduction | Estimated annual risk out of 10,000 |                             |                             |
|---------------------------|----------------|-------------------------------------|-----------------------------|-----------------------------|
|                           |                | 10 <sup>th</sup> percentile         | 50 <sup>th</sup> percentile | 90 <sup>th</sup> percentile |
| <i>Giardia duodenalis</i> | None           | 5300                                | 7100                        | 9600                        |
|                           | 1E-01          | 730                                 | 1200                        | 2700                        |
|                           | 1E-02          | 76                                  | 121                         | 311                         |
|                           | 1E-03          | 7.6                                 | 12                          | 31                          |
|                           | 1E-04          | 0.76                                | 1.2                         | 3.2                         |
|                           | <b>1E-05</b>   | 0.076                               | <b>0.12</b>                 | 0.32                        |
| <i>Shigella</i> /EIEC     | None           | 2800                                | 4000                        | 5560                        |
|                           | 1E-01          | 330                                 | 540                         | 1000                        |
|                           | 1E-02          | 34                                  | 57                          | 110                         |
|                           | 1E-03          | 3.4                                 | 5.7                         | 11                          |
|                           | <b>1E-04</b>   | 0.34                                | <b>0.57</b>                 | 1.1                         |
|                           | 1E-05          | 0.033                               | 0.057                       | 0.11                        |

176 Note: bold indicates median risk  $\leq 1$  in 10,000 annual infection risk

177

178 Figure S7. Simulated dose reduction intervention graphs

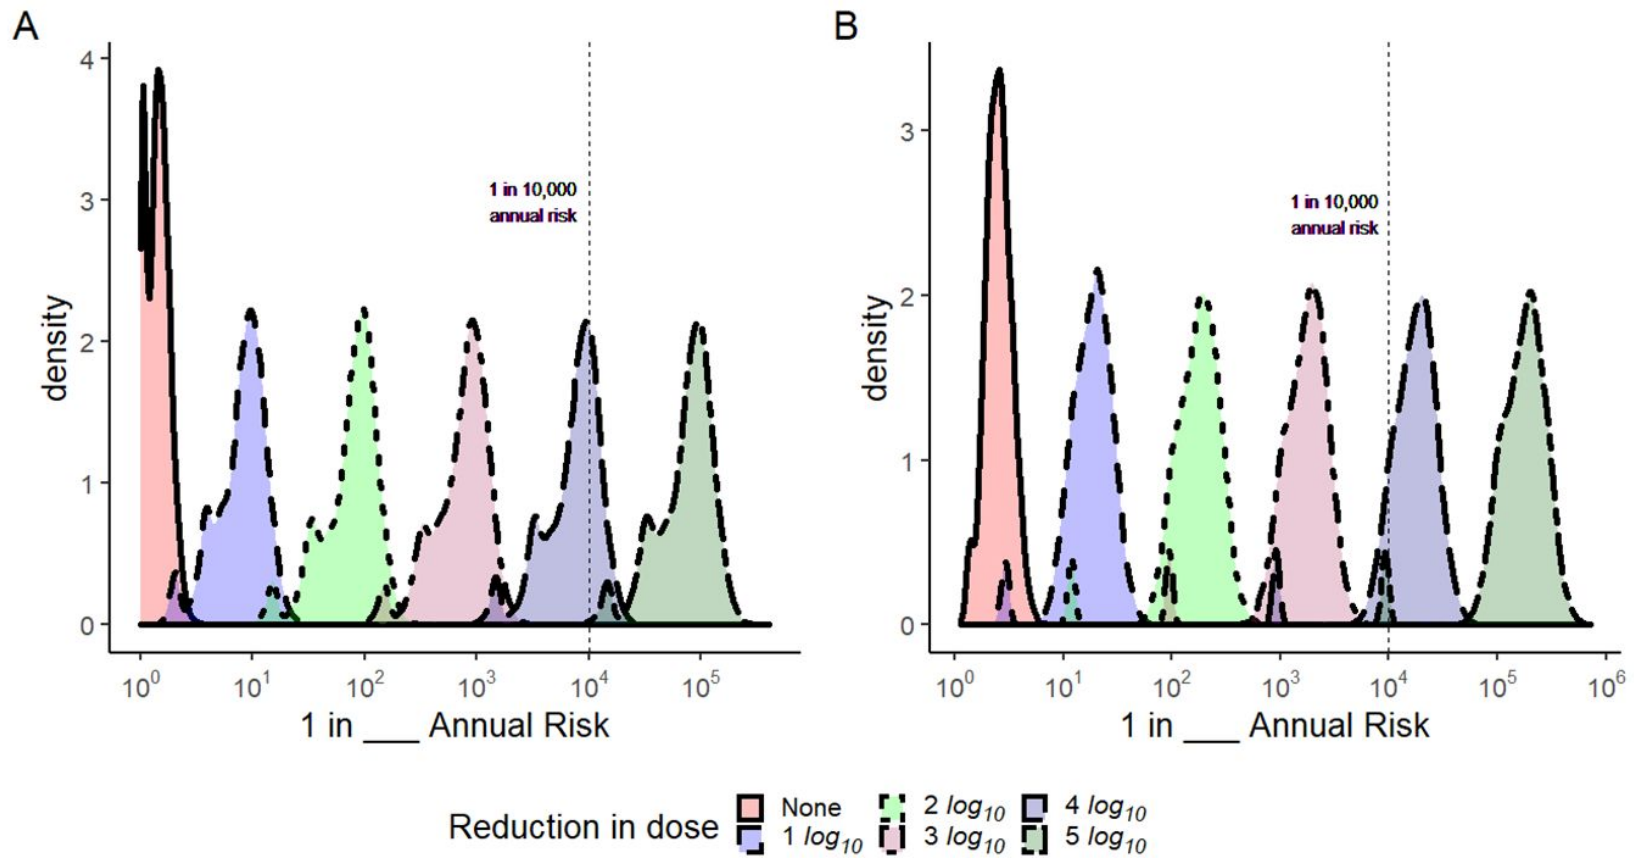

179

180 Simulated intervention by reducing the ingested dose parameter for *Giardia duodenalis* (7A) and *Shigella*/EIEC (7B). Stochastic  
 181 exposure parameters are from Kwong *et al.* 2019 for children 12-23 months old



183 Figure S8

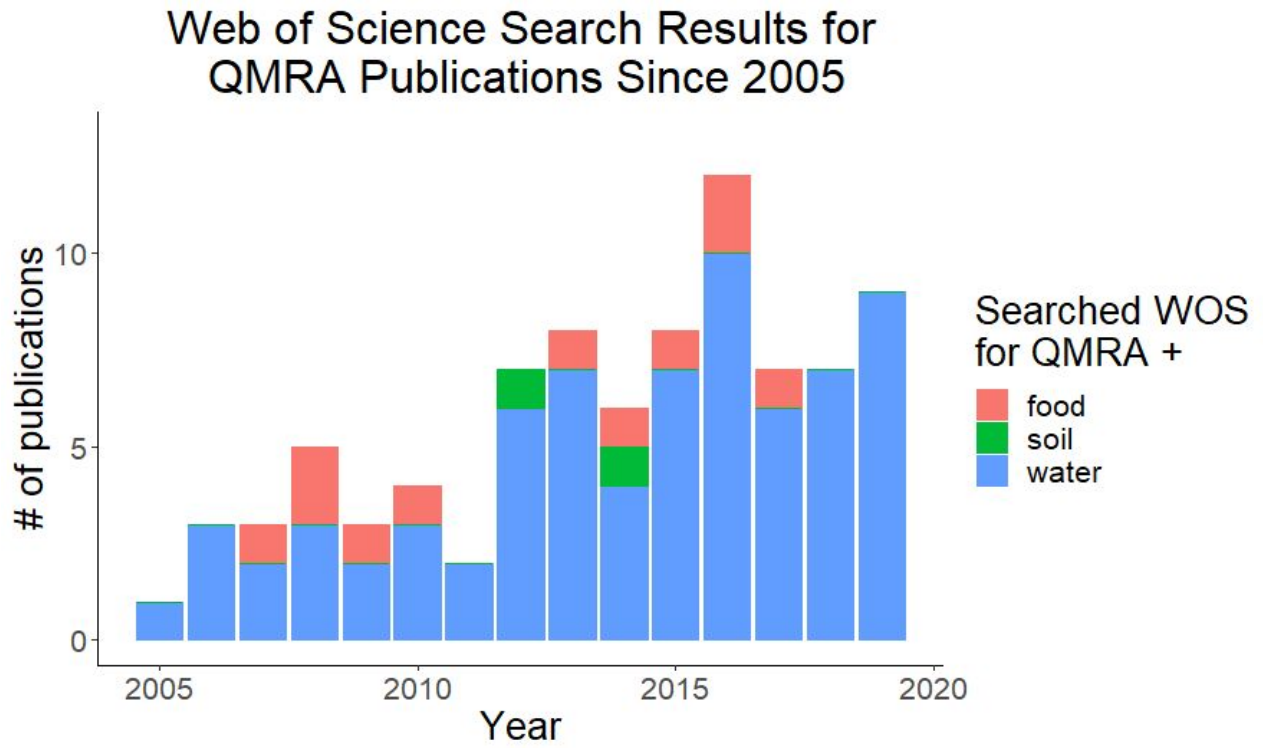

184

185 Results from Web of Science search (<https://www.webofknowledge.com/>) for publications with  
186 titles containing the words “QMRA” OR “quantitative microbial risk assessment”, and either  
187 “water”, “soil”, or “food”

189 **References**

- 190 (1) Bivins, A.; Lowry, S.; Murphy, H. M.; Borchardt, M.; Coyte, R.; Labhasetwar, P.; Brown,  
191 J. Waterborne Pathogen Monitoring in Jaipur, India Reveals Potential Microbial Risks of  
192 Urban Groundwater Supply. *npj Clean Water* **2020**, 3 (1), 1–10.
- 193 (2) Basu, A. S. Digital Assays Part I: Partitioning Statistics and Digital PCR. *SLAS Technol.*  
194 *Transl. Life Sci. Innov.* **2017**, 22 (4), 369–386.

195
